# Supplementary material for: Mn2+-doped organic–inorganic hybrids (C8H20N)2Zn1−xMnxBr4 as sub-micrometer green phosphors for Mini-LEDs/Micro-LEDs
Source: Royal Society of Chemistry journal article supplement (doi:10.1039/d3tc00984j), 2023-01-01
Supplement: d3tc00984j1.pdf [file d3tc00984j1.pdf]

## Supporting Information

### **Mn<sup>2+</sup>-doped organic-inorganic hybrid (C<sub>8</sub>H<sub>20</sub>N)<sub>2</sub>Zn<sub>1-x</sub>Mn<sub>x</sub>Br<sub>4</sub> as sub-micrometer green phosphor for Mini-LED/Micro-LED**

Sixiang Wang,<sup>a</sup> Yichang Wang,<sup>a</sup> DaeHo Yoon,<sup>b</sup> Tianrong Li,<sup>\*a</sup> and Yuhua Wang<sup>\*a</sup>

<sup>a</sup> *School of Materials and Energy, National and Local Joint Engineering Laboratory for Optical Conversion Materials, Lanzhou University, Lanzhou 730000, China*

<sup>b</sup> *School of Advanced Materials Science & Engineering, Sungkyunkwan University, Suwon 16419, Korea.*

\*Corresponding authors.

E-mail addresses: [litr@lzu.edu.cn](mailto:litr@lzu.edu.cn) (Tianrong Li), [wyh@lzu.edu.cn](mailto:wyh@lzu.edu.cn) (Yuhua Wang).

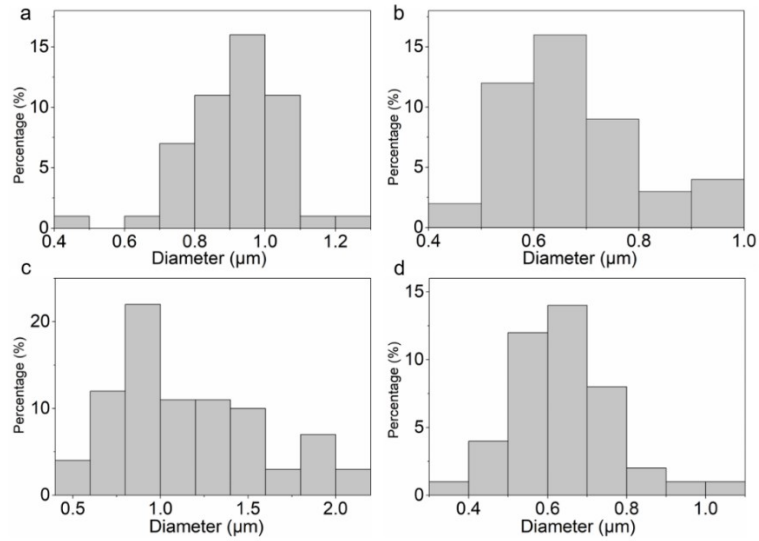

Figure S1. Size distribution of  $(\text{C}_8\text{H}_{20}\text{N})_2\text{Zn}_{1-x}\text{Mn}_x\text{Br}_4$  (a)  $x = 0$ , (b)  $x = 0.1$ , (c)  $x = 0.2$ , and (d)  $x = 0.3$ .

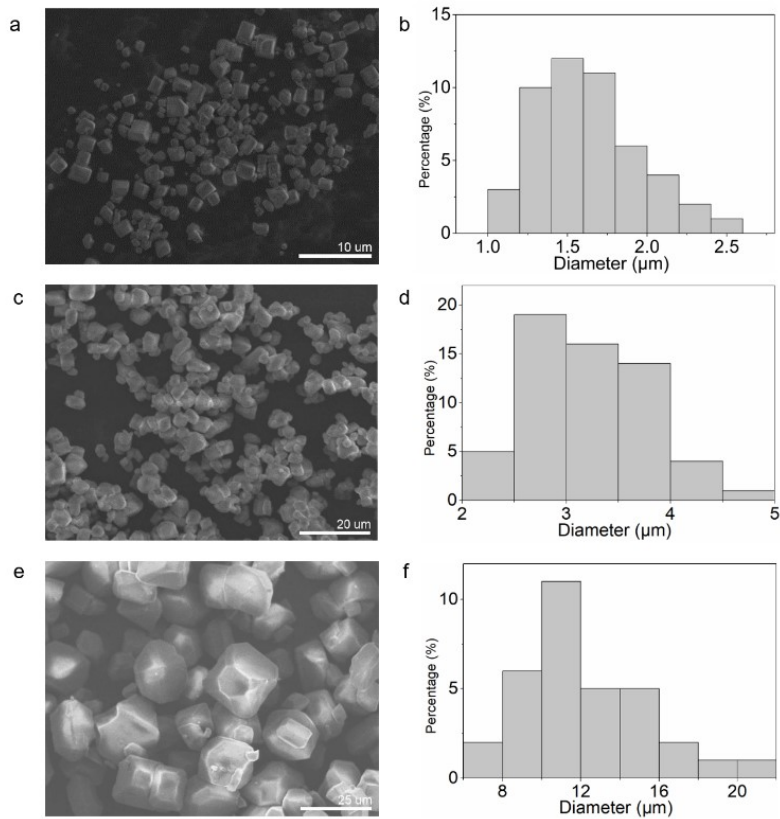

Figure S2. (a) SEM image and (b) size distribution of  $(\text{C}_8\text{H}_{20}\text{N})_2\text{MnBr}_4$ . (c) SEM image and (d) size distribution of  $(\text{C}_8\text{H}_{20}\text{N})_2\text{Zn}_{0.2}\text{Mn}_{0.8}\text{Br}_4$ . (e) SEM image and (f) size distribution of  $(\text{C}_8\text{H}_{20}\text{N})_2\text{Zn}_{0.5}\text{Mn}_{0.5}\text{Br}_4$ .

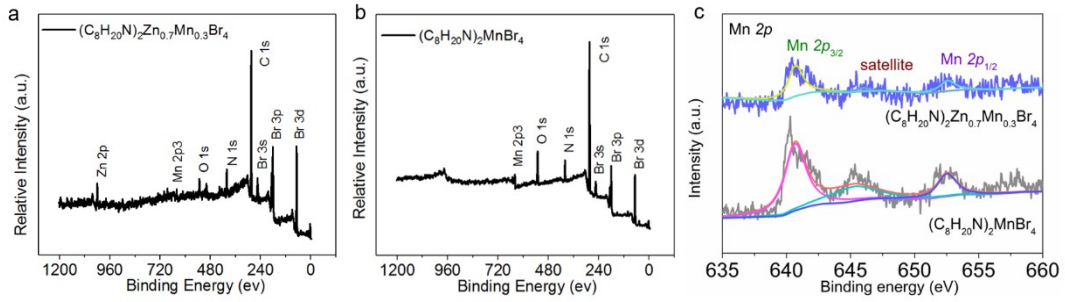

Figure S3. XPS survey spectra of (a)  $(\text{C}_8\text{H}_{20}\text{N})_2\text{Zn}_{0.7}\text{Mn}_{0.3}\text{Br}_4$  and (b)  $(\text{C}_8\text{H}_{20}\text{N})_2\text{MnBr}_4$ . (c) HR-XPS spectra of  $(\text{C}_8\text{H}_{20}\text{N})_2\text{Zn}_{0.7}\text{Mn}_{0.3}\text{Br}_4$  and  $(\text{C}_8\text{H}_{20}\text{N})_2\text{MnBr}_4$  of Mn  $2p$ , the satellite peak also belongs to  $\text{Mn}^{2+}$

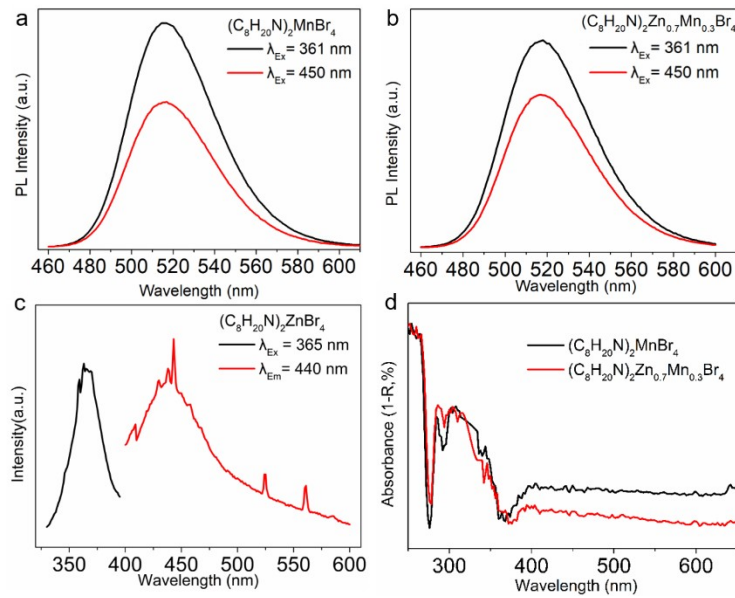

Figure S4. (a) PL spectra of  $(\text{C}_8\text{H}_{20}\text{N})_2\text{MnBr}_4$  and (b)  $(\text{C}_8\text{H}_{20}\text{N})_2\text{Zn}_{0.7}\text{Mn}_{0.3}\text{Br}_4$  triggered by different excitation wavelengths. (c) PL spectra of  $(\text{C}_8\text{H}_{20}\text{N})_2\text{ZnBr}_4$ . (d) Absorption spectra of  $(\text{C}_8\text{H}_{20}\text{N})_2\text{MnBr}_4$  and  $(\text{C}_8\text{H}_{20}\text{N})_2\text{Zn}_{0.7}\text{Mn}_{0.3}\text{Br}_4$

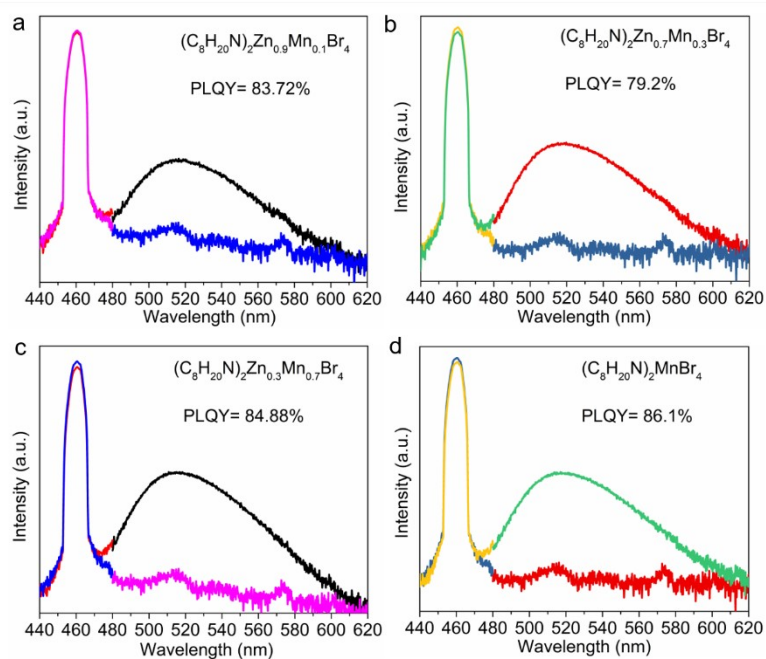

Figure S5. PLQY results of  $(\text{C}_8\text{H}_{20}\text{N})_2\text{Zn}_{1-x}\text{Mn}_x\text{Br}_4$  ( $x = 0.1, 0.3, 0.7,$  and  $1.0$ ) at 460 nm excitation.

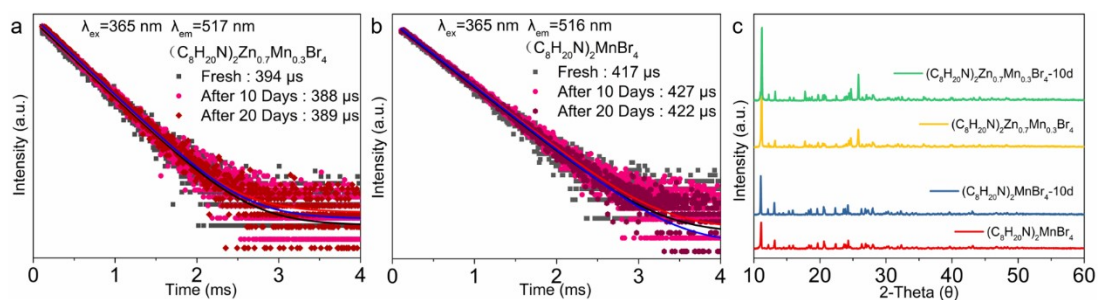

Figure S6. Decay curves of (a)  $(\text{C}_8\text{H}_{20}\text{N})_2\text{Zn}_{0.7}\text{Mn}_{0.3}\text{Br}_4$  and (b)  $(\text{C}_8\text{H}_{20}\text{N})_2\text{MnBr}_4$  overtime during the stability experiments. (c) XRD patterns of  $(\text{C}_8\text{H}_{20}\text{N})_2\text{Zn}_{0.7}\text{Mn}_{0.3}\text{Br}_4$  and  $(\text{C}_8\text{H}_{20}\text{N})_2\text{MnBr}_4$  during the stability experiments.

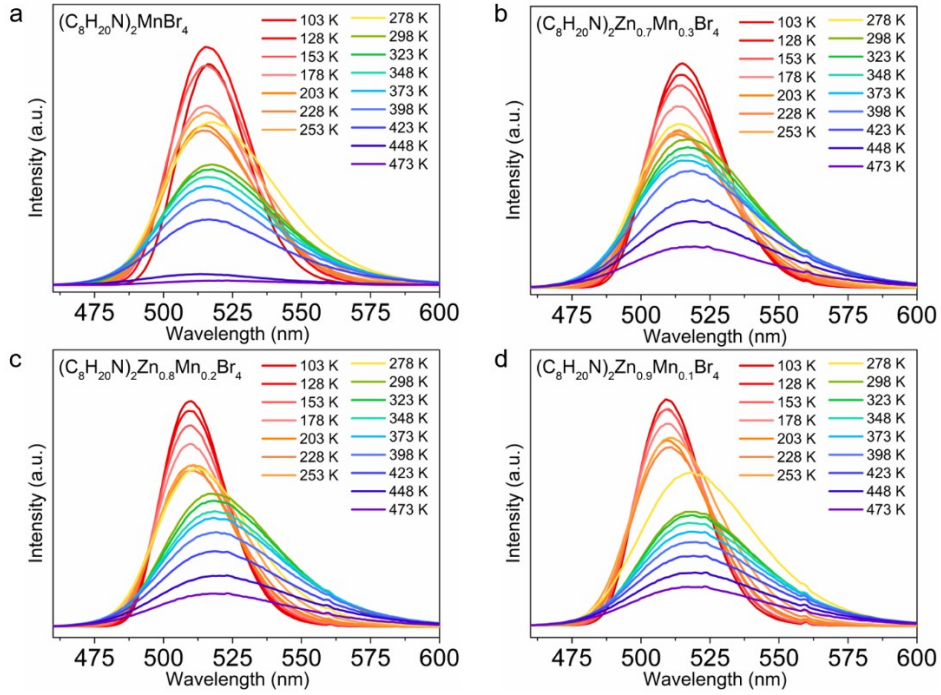

Figure S7. Temperature-dependent PL spectra of (a)  $(\text{C}_8\text{H}_{20}\text{N})_2\text{MnBr}_4$ , (b)  $(\text{C}_8\text{H}_{20}\text{N})_2\text{Zn}_{0.7}\text{Mn}_{0.3}\text{Br}_4$ , (c)  $(\text{C}_8\text{H}_{20}\text{N})_2\text{Zn}_{0.8}\text{Mn}_{0.2}\text{Br}_4$  and (d)  $(\text{C}_8\text{H}_{20}\text{N})_2\text{Zn}_{0.9}\text{Mn}_{0.1}\text{Br}_4$  ( $T = 103\text{--}473\text{ K}$ ,  $\lambda_{\text{ex}} = 361\text{ nm}$ ).

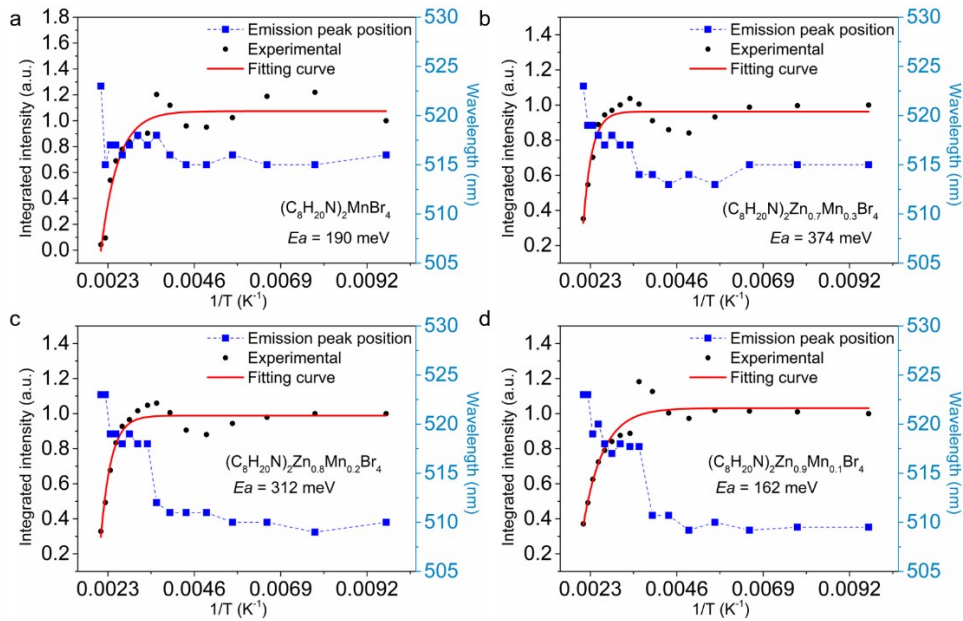

Figure S8. Temperature-dependent emission peak position and integrated PL intensity and the corresponding fitting curves of (a)  $(\text{C}_8\text{H}_{20}\text{N})_2\text{MnBr}_4$ , (b)  $(\text{C}_8\text{H}_{20}\text{N})_2\text{Zn}_{0.7}\text{Mn}_{0.3}\text{Br}_4$ , (c)  $(\text{C}_8\text{H}_{20}\text{N})_2\text{Zn}_{0.8}\text{Mn}_{0.2}\text{Br}_4$  and (d)  $(\text{C}_8\text{H}_{20}\text{N})_2\text{Zn}_{0.9}\text{Mn}_{0.1}\text{Br}_4$  in the range of  $103 \sim 473\text{ K}$ .

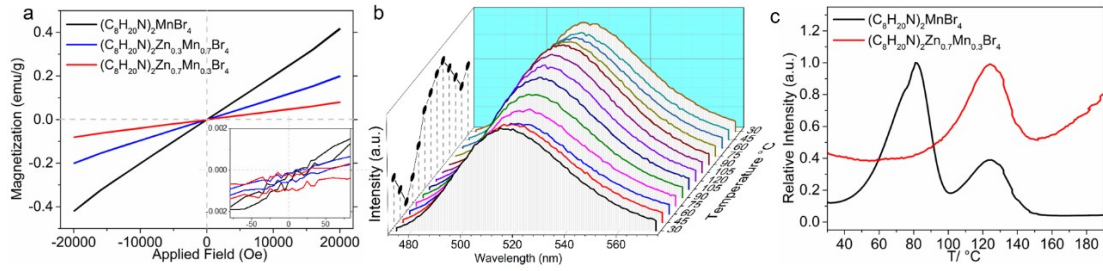

Figure S9. (a) M-H loops of  $(\text{C}_8\text{H}_{20}\text{N})_2\text{Zn}_{1-x}\text{Mn}_x\text{Br}_4$  ( $x = 0.3, 0.7, \text{ and } 1.0$ ). The inset shows the magnified area near the zero magnetic field of M-H loops. (b) Temperature-dependent PL spectra of  $(\text{C}_8\text{H}_{20}\text{N})_2\text{MnBr}_4$  after being fully illuminated in the temperature range of  $30\text{ }^\circ\text{C}$  to  $120\text{ }^\circ\text{C}$  and  $120\text{ }^\circ\text{C}$  to  $30\text{ }^\circ\text{C}$ . The inset shows the relative emission intensity at different temperatures. (c) Thermo-luminescent spectra of  $(\text{C}_8\text{H}_{20}\text{N})_2\text{Zn}_{0.7}\text{Mn}_{0.3}\text{Br}_4$  and  $(\text{C}_8\text{H}_{20}\text{N})_2\text{MnBr}_4$ .

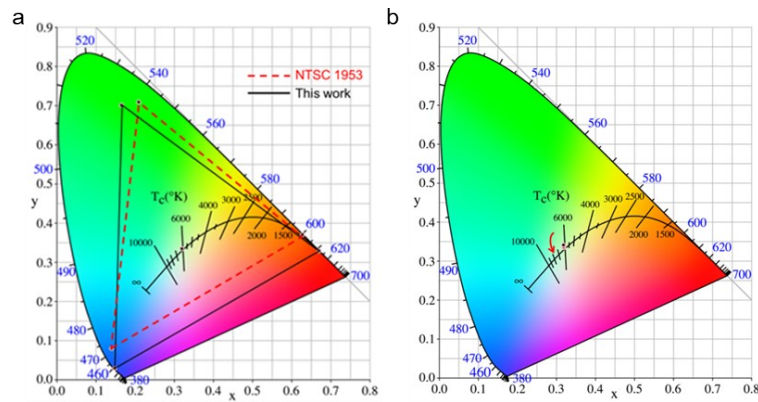

Figure S10. (a) Color gamut range  $(\text{C}_8\text{H}_{20}\text{N})_2\text{Zn}_{0.7}\text{Mn}_{0.3}\text{Br}_4$  contrast NTSC standard. (b) The change of color coordinate of the WLED under different currents.



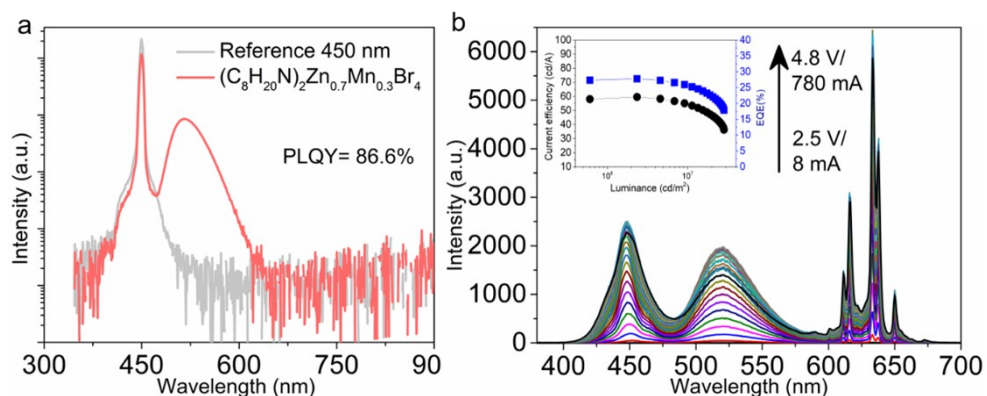

Figure S11. (a) PLQY of  $(\text{C}_8\text{H}_{20}\text{N})_2\text{Zn}_{0.7}\text{Mn}_{0.3}\text{Br}_4$  powder under 450 nm excitation. (b) Electroluminescence spectra of the W-LED device under different power efficiencies. The inset shows the external quantum efficiency (EQE) versus luminance characteristics for WLED devices based on  $(\text{C}_8\text{H}_{20}\text{N})_2\text{Zn}_{0.7}\text{Mn}_{0.3}\text{Br}_4$ .

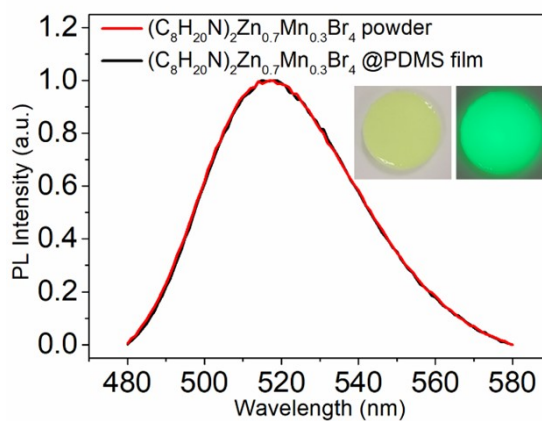

Figure S12. PL spectra of a flexible and luminescent film encapsulated by the  $(\text{C}_8\text{H}_{20}\text{N})_2\text{Zn}_{0.7}\text{Mn}_{0.3}\text{Br}_4$  powder and polydimethylsiloxane (PDMS). Illustration: photos of the film under visible light and 365 nm light.

**Table S1. Crystal data and structure refinement of  $(C_8H_{20}N)_2Zn_{1-x}Mn_xBr_4$  ( $x = 0, 0.3, 0.5,$  and  $1$ )**

| Empirical formula     | $(C_8H_{20}N)_2MnBr_4$ | $(C_8H_{20}N)_2Zn_{0.5}Mn_{0.5}Br_4$ | $(C_8H_{20}N)_2Zn_{0.7}Mn_{0.3}Br_4$ | $(C_8H_{20}N)_2ZnBr_4$ |
|-----------------------|------------------------|--------------------------------------|--------------------------------------|------------------------|
| Temperature/K         | 293                    | 150                                  | 293                                  | 303                    |
| Crystal color         | Green                  | Green                                | Green                                | Colorless              |
| Crystal system        | Tetragonal             | Tetragonal                           | Tetragonal                           | Tetragonal             |
| Space group           | P -421m                | P-421m                               | P42/n m c                            | P 42/n m c             |
| a/Å                   | 13.3908(6)             | 13.2487(2)                           | 8.9998(4)                            | 9.0097(5)              |
| b/Å                   | 13.3908(6)             | 13.2487(2)                           | 8.9998(5)                            | 9.0097(5)              |
| c/Å                   | 14.4477(9)             | 14.3725(5)                           | 15.9725(7)                           | 16.0020(10)            |
| $\alpha/^\circ$       | 90                     | 90                                   | 90                                   | 90                     |
| $\beta/^\circ$        | 90                     | 90                                   | 90                                   | 90                     |
| $\gamma/^\circ$       | 90                     | 90                                   | 90                                   | 90                     |
| Volume/Å <sup>3</sup> | 2590.7(3)              | 2522.78(12)                          | 1293.7(11)                           | 1298.96(17)            |

**Table S2. Fractional Atomic Coordinates ( $\times 10^4$ ) and Equivalent Isotropic Displacement Parameters ( $\text{Å}^2 \times 10^3$ ) for  $(C_8H_{20}N)_2Zn_{0.5}Mn_{0.5}Br_4$ .  $U_{eq}$  is defined as 1/3 of the trace of the orthogonalized  $U_{ij}$  tensor.**

| Atom | $x$        | $y$        | $z$        | $U(eq)$ |
|------|------------|------------|------------|---------|
| Br01 | 8677.3(13) | 6322.7(13) | 6959.0(15) | 30.4(5) |
| Br02 | 7555.8(13) | 7444.2(13) | 9474.8(16) | 35.0(5) |
| Br03 | 5730.9(13) | 7045.3(14) | 7235.3(13) | 37.4(4) |
| Mn04 | 7478.3(16) | 7521.7(16) | 7732.0(2)  | 23.2(6) |
| N005 | 5000.0     | 10000.0    | -42(19)    | 27(5)   |
| N006 | 7074.0     | 7926.0(9)  | 4209(12)   | 22(3)   |
| N007 | 5000.0     | 5000.0     | 0          | 24(5)   |
| C008 | 6242(13)   | 7468(13)   | 3633(11)   | 31(3)   |
| C009 | 7890(15)   | 7110(15)   | 4457(19)   | 39(5)   |
| C00A | 5523(19)   | 6220(2)    | 1316(17)   | 56(5)   |
| C00B | 5687(16)   | 6577(15)   | 4096(14)   | 43(4)   |
| C00C | 8378(17)   | 6622(17)   | 3600(2)    | 48(7)   |
| C00D | 5923(14)   | 9077(14)   | 1293(18)   | 36(5)   |
| C00E | 6723(14)   | 8277(14)   | 5157(19)   | 37(5)   |
| C00F | 5900(2)    | 9100(2)    | 5080(3)    | 62(9)   |
| N00G | 9090(3)    | 5910(3)    | 1350(3)    | 109(15) |
| C00H | 5910(2)    | 5340(2)    | 592(19)    | 60(6)   |



| Atom | <i>x</i> | <i>y</i> | <i>z</i> | U(eq)  |
|------|----------|----------|----------|--------|
| C00I | 5070(3)  | 9020(3)  | 570(3)   | 98(11) |

**Table S3. Bond Lengths for (C<sub>8</sub>H<sub>20</sub>N)<sub>2</sub>Zn<sub>0.5</sub>Mn<sub>0.5</sub>Br<sub>4</sub>.**

| Atom | Atom | Length/Å  |
|------|------|-----------|
| Br01 | Mn04 | 2.506(4)  |
| Br02 | Mn04 | 2.509(4)  |
| Br03 | Mn04 | 2.503(2)  |
| N005 | C00I | 1.56(4)   |
| N006 | C008 | 1.507(19) |
| N006 | C008 | 1.507(19) |
| N006 | C009 | 1.57(3)   |
| N006 | C00E | 1.51(3)   |
| N007 | C00H | 1.54(3)   |
| C008 | C00B | 1.54(3)   |
| C009 | C00C | 1.54(4)   |
| C00A | C00H | 1.65(4)   |
| C00D | C00I | 1.54(4)   |
| C00D | C00I | 1.54(4)   |
| C00E | C00F | 1.54(5)   |
| C00I | C00I | 1.96(8)   |
| C00I | C00I | 1.69(8)   |

**Table S4. Bond Angles for (C<sub>8</sub>H<sub>20</sub>N)<sub>2</sub>Zn<sub>0.5</sub>Mn<sub>0.5</sub>Br<sub>4</sub>.**

| Atom | Atom | Atom | Angle/°    | Atom | Atom | Atom | Angle/°   |
|------|------|------|------------|------|------|------|-----------|
| Br01 | Mn04 | Br02 | 112.99(14) | C00H | N007 | C00H | 107.7(10) |
| Br03 | Mn04 | Br01 | 107.45(9)  | C00H | N007 | C00H | 113(2)    |
| Br03 | Mn04 | Br01 | 107.45(9)  | C00H | N007 | C00H | 113(2)    |
| Br03 | Mn04 | Br02 | 108.19(9)  | C00H | N007 | C00H | 107.7(10) |
| Br03 | Mn04 | Br02 | 108.19(9)  | C00H | N007 | C00H | 107.7(10) |
| Br03 | Mn04 | Br03 | 112.64(14) | N006 | C008 | C00B | 114.8(14) |
| C00I | N005 | C00I | 78(3)      | C00C | C009 | N006 | 113(2)    |
| C00I | N005 | C00I | 112(3)     | C00I | C00D | C00I | 67(3)     |
| C00I | N005 | C00I | 65(3)      | N006 | C00E | C00F | 112(2)    |
| C00I | N005 | C00I | 65(3)      | N007 | C00H | C00A | 108.2(18) |
| C00I | N005 | C00I | 78(3)      | N005 | C00I | C00I | 51.1(15)  |
| C00I | N005 | C00I | 112(3)     | N005 | C00I | C00I | 57.3(15)  |
| C008 | N006 | C008 | 106.7(16)  | C00D | C00I | N005 | 113(3)    |
| C008 | N006 | C009 | 110.6(11)  | C00D | C00I | C00I | 119.1(17) |
| C008 | N006 | C009 | 110.6(11)  | C00D | C00I | C00I | 56.6(15)  |
| C008 | N006 | C00E | 113.1(11)  | C00I | C00I | C00I | 89.999(1) |
| C008 | N006 | C00E | 113.1(11)  | C00E | N006 | C009 | 102.7(17) |

**Table S5. Torsion Angles for (C<sub>8</sub>H<sub>20</sub>N)<sub>2</sub>Zn<sub>0.5</sub>Mn<sub>0.5</sub>Br<sub>4</sub>.**

| A    | B    | C    | D    | Angle/°    |
|------|------|------|------|------------|
| C008 | N006 | C008 | C00B | 178.8(11)  |
| C008 | N006 | C009 | C00C | -59.0(11)  |
| C008 | N006 | C009 | C00C | 59.0(11)   |
| C008 | N006 | C00E | C00F | 60.8(12)   |
| C008 | N006 | C00E | C00F | -60.8(12)  |
| C009 | N006 | C008 | C00B | 58.5(19)   |
| C009 | N006 | C00E | C00F | 179.999(8) |
| C00E | N006 | C008 | C00B | -56(2)     |
| C00E | N006 | C009 | C00C | 179.999(5) |
| C00H | N007 | C00H | C00A | -173.4(19) |
| C00H | N007 | C00H | C00A | 64.4(10)   |
| C00H | N007 | C00H | C00A | -54.5(14)  |
| C00I | N005 | C00I | C00D | -53(2)     |

|      |      |      |      |           |
|------|------|------|------|-----------|
| C00I | N005 | C00I | C00D | 11(3)     |
| C00I | N005 | C00I | C00D | -110(2)   |
| C00I | N005 | C00I | C00I | 121(2)    |
| C00I | N005 | C00I | C00I | 57(2)     |
| A    | B    | C    | D    | Angle/°   |
| C00I | N005 | C00I | C00I | -121(2)   |
| C00I | N005 | C00I | C00I | -64.3(17) |
| C00I | C00D | C00I | N005 | -11(3)    |
| C00I | C00D | C00I | C00I | -68.4(17) |

**Table S6. Fractional Atomic Coordinates ( $\times 10^4$ ) and Equivalent Isotropic Displacement Parameters ( $\text{\AA}^2 \times 10^3$ ) for  $(\text{C}_8\text{H}_{20}\text{N})_2\text{ZnBr}_4$ .  $U_{\text{eq}}$  is defined as 1/3 of the trace of the orthogonalised  $U_{\text{IJ}}$  tensor.**

| Atom | $x$      | $y$        | $z$       | $U(\text{eq})$ |
|------|----------|------------|-----------|----------------|
| Zn01 | 2500     | 7500       | 2500      | 55.7(6)        |
| Br02 | 2500     | 5330.1(13) | 1625.5(7) | 100.9(6)       |
| N003 | 2500     | 2500       | 4145(5)   | 65(2)          |
| C004 | 2500     | 4788(16)   | 5048(10)  | 156(8)         |
| C006 | 2500     | 4230(30)   | 4175(14)  | 96(6)          |
| C2   | 2500     | 2500       | 4970(20)  | 208(16)        |
| C1   | -50(40)  | 2500       | 3420(30)  | 168(14)        |
| C3   | 830(20)  | 2500       | 4150(20)  | 211(13)        |
| C3A  | 1860(30) | 1780(30)   | 3397(12)  | 93(7)          |
| C1A  | 390(50)  | 2110(70)   | 3050(30)  | 160(20)        |

**Table S7. Anisotropic Displacement Parameters ( $\text{\AA}^2 \times 10^3$ ) for  $(\text{C}_8\text{H}_{20}\text{N})_2\text{ZnBr}_4$ . The Anisotropic displacement factor exponent takes the form:  $-2\pi^2[h_2a^*2U_{11}+2hka^*b^*U_{12}+\dots]$ .**

| Atom | $U_{11}$  | $U_{22}$ | $U_{33}$ | $U_{23}$ | $U_{13}$ | $U_{12}$ |
|------|-----------|----------|----------|----------|----------|----------|
| Zn01 | 62.9(8)   | 62.9(8)  | 41.4(8)  | 0        | 0        | 0        |
| Br02 | 132.9(11) | 83.2(8)  | 86.6(9)  | -31.8(5) | 0        | 0        |
| N003 | 83(7)     | 61(5)    | 51(5)    | 0        | 0        | 0        |
| C004 | 250(20)   | 101(10)  | 120(12)  | -51(9)   | 0        | 0        |
| C006 | 106(10)   | 92(9)    | 91(9)    | -8(8)    | 0        | 0        |
| C2   | 220(20)   | 260(20)  | 147(19)  | 0        | 0        | 0        |
| C1   | 166(15)   | 172(15)  | 167(15)  | 0        | -4(5)    | 0        |
| C3   | 208(15)   | 219(15)  | 205(15)  | 0        | -4(10)   | 0        |

| Atom | U <sub>11</sub> | U <sub>22</sub> | U <sub>33</sub> | U <sub>23</sub> | U <sub>13</sub> | U <sub>12</sub> |
|------|-----------------|-----------------|-----------------|-----------------|-----------------|-----------------|
| C3A  | 96(10)          | 97(10)          | 85(9)           | -11(7)          | -11(7)          | 12(8)           |
| C1A  | 160(20)         | 170(20)         | 170(20)         | -7(10)          | -10(10)         | 0(10)           |

**Table S8. Bond Lengths for (C<sub>8</sub>H<sub>20</sub>N)<sub>2</sub>ZnBr<sub>4</sub>.**

| Atom Atom              | Length/Å   | Atom Atom             | Length/Å  |
|------------------------|------------|-----------------------|-----------|
| Zn01 Br02              | 2.4042(10) | N003 C3A              | 1.476(18) |
| Zn01 Br02 <sup>1</sup> | 2.4042(10) | N003 C3A <sup>4</sup> | 1.476(18) |
| Zn01 Br02 <sup>2</sup> | 2.4042(10) | C004 C006             | 1.49(2)   |
| Zn01 Br02 <sup>3</sup> | 2.4042(10) | C1 C3                 | 1.41(4)   |
| N003 C006 <sup>4</sup> | 1.56(2)    | C3A C3A <sup>5</sup>  | 1.29(5)   |
| N003 C006              | 1.56(2)    | C3A C3A <sup>4</sup>  | 1.73(4)   |
| N003 C2                | 1.31(3)    | C3A C3A <sup>6</sup>  | 1.15(5)   |
| N003 C3                | 1.51(2)    | C3A C1A               | 1.47(5)   |
| N003 C3 <sup>4</sup>   | 1.51(2)    | C3A C1A <sup>5</sup>  | 1.75(5)   |
| N003 C3A <sup>5</sup>  | 1.476(18)  | C1A C1A <sup>5</sup>  | 0.70(12)  |
| N003 C3A <sup>6</sup>  | 1.476(18)  |                       |           |

**Table S9. Bond Angles for (C<sub>8</sub>H<sub>20</sub>N)<sub>2</sub>ZnBr<sub>4</sub>.**

| Atom Atom Atom                           | Angle/°   | Atom Atom Atom                        | Angle/°   |
|------------------------------------------|-----------|---------------------------------------|-----------|
| Br02 Zn01 Br02 <sup>1</sup>              | 109.80(3) | C1 C3 N003                            | 124(3)    |
| Br02 Zn01 Br02 <sup>2</sup>              | 109.80(3) | N003 C3A C3A <sup>4</sup>             | 54.1(9)   |
| Br02 <sup>3</sup> Zn01 Br02 <sup>2</sup> | 109.80(3) | N003 C3A C1A <sup>5</sup>             | 108(2)    |
| Br02 <sup>1</sup> Zn01 Br02 <sup>3</sup> | 109.80(3) | C3A <sup>6</sup> C3A N003             | 67.1(10)  |
| Br02 <sup>1</sup> Zn01 Br02 <sup>2</sup> | 108.82(6) | C3A <sup>5</sup> C3A N003             | 64.0(10)  |
| Br02 Zn01 Br02 <sup>3</sup>              | 108.82(6) | C3A <sup>4</sup> C3A C1A <sup>5</sup> | 94(3)     |
| C006 <sup>4</sup> N003 C006              | 176.4(18) | C3A <sup>5</sup> C3A C1A <sup>5</sup> | 55(2)     |
| C2 N003 C3A                              | 144.1(9)  | C3A <sup>5</sup> C3A C1A              | 78(2)     |
| C3 <sup>4</sup> N003 C006 <sup>4</sup>   | 90.00(5)  | C3A <sup>6</sup> C3A C1A <sup>5</sup> | 139(2)    |
| C3 N003 C006                             | 90.00(5)  | C3A <sup>6</sup> C3A C1A              | 154.6(19) |
| C3 N003 C006 <sup>4</sup>                | 90.00(5)  | C1A C3A N003                          | 125(3)    |
| C3 <sup>4</sup> N003 C006                | 90.00(5)  | C1A C3A C1A <sup>5</sup>              | 23(4)     |
| C3 <sup>4</sup> N003 C3                  | 180(3)    | C1A <sup>5</sup> C1A C3A              | 102(2)    |
| C004 C006 N003                           | 111.7(16) |                                       |           |

**Table S10. Torsion Angles for (C<sub>8</sub>H<sub>20</sub>N)<sub>2</sub>ZnBr<sub>4</sub>.**

| A                 | B    | C    | D                | Angle/°    | A                | B    | C   | D                | Angle/°   |
|-------------------|------|------|------------------|------------|------------------|------|-----|------------------|-----------|
| N003              | C3A  | C1A  | C3A <sup>1</sup> | 47(2)      | C3A <sup>1</sup> | N003 | C3A | C3A <sup>2</sup> | 47.6(18)  |
| N003              | C3A  | C1A  | C1A <sup>1</sup> | 47(2)      | C3A <sup>3</sup> | N003 | C3A | C3A <sup>2</sup> | -54.3(17) |
| C006 <sup>2</sup> | N003 | C3   | C1               | -91.8(9)   | C3A <sup>3</sup> | N003 | C3A | C1A              | -154(3)   |
| C006              | N003 | C3   | C1               | 91.8(9)    | C3A <sup>1</sup> | N003 | C3A | C1A              | -52(3)    |
| C2                | N003 | C3A  | C3A <sup>1</sup> | 132.4(18)  | C3A <sup>2</sup> | N003 | C3A | C1A              | -100(3)   |
| C2                | N003 | C3A  | C3A <sup>3</sup> | -125.7(17) | C3A <sup>2</sup> | N003 | C3A | C1A <sup>1</sup> | -83(3)    |
| C2                | N003 | C3A  | C3A <sup>2</sup> | 179.999(3) | C3A <sup>1</sup> | N003 | C3A | C1A <sup>1</sup> | -35(2)    |
| C2                | N003 | C3A  | C1A              | 80(3)      | C3A <sup>3</sup> | N003 | C3A | C1A <sup>1</sup> | -137(2)   |
| C2                | N003 | C3A  | C1A <sup>1</sup> | 97(3)      | C3A <sup>2</sup> | C3A  | C1A | C3A <sup>1</sup> | -16.7(19) |
| C3                | N003 | C006 | C004             | 89.9(15)   | C3A <sup>3</sup> | C3A  | C1A | C3A <sup>1</sup> | -64(6)    |
| C3 <sup>2</sup>   | N003 | C006 | C004             | -89.9(15)  | C3A <sup>3</sup> | C3A  | C1A | C1A <sup>1</sup> | -64(6)    |
| C3A <sup>1</sup>  | N003 | C3A  | C3A <sup>3</sup> | 101.9(6)   | C3A <sup>1</sup> | C3A  | C1A | C1A <sup>1</sup> | -0.004(9) |
| C3A <sup>3</sup>  | N003 | C3A  | C3A <sup>1</sup> | -101.9(6)  | C3A <sup>2</sup> | C3A  | C1A | C1A <sup>1</sup> | -16.7(19) |
| C3A <sup>2</sup>  | N003 | C3A  | C3A <sup>3</sup> | 54.3(17)   | C1A <sup>1</sup> | C3A  | C1A | C3A <sup>1</sup> | 0.004(11) |
| C3A <sup>2</sup>  | N003 | C3A  | C3A <sup>1</sup> | -47.6(18)  |                  |      |     |                  |           |

**Table S11. Fractional Atomic Coordinates ( $\times 10^4$ ) and Equivalent Isotropic Displacement Parameters ( $\text{\AA}^2 \times 10^3$ ) for (C<sub>8</sub>H<sub>20</sub>N)<sub>2</sub>Zn<sub>0.7</sub>Mn<sub>0.3</sub>Br<sub>4</sub>. U<sub>eq</sub> is defined as 1/3 of the trace of the orthogonalised U<sub>ij</sub> tensor.**

| Atom | x      | y       | z      | U(eq) |
|------|--------|---------|--------|-------|
| Zn0  | 0.7500 | 0.2500  | 0.2500 | 0.057 |
| Br02 | 0.9666 | 0.2500  | 0.3374 | 0.102 |
| N003 | 1.2500 | 0.2500  | 0.0869 | 0.066 |
| C004 | 0.7500 | -0.0188 | 0.5060 | 0.184 |
| C1   | 1.3250 | 0.3272  | 0.0039 | 0.353 |
| C2   | 1.2500 | 0.5105  | 0.1716 | 0.202 |
| C3   | 0.7500 | -0.0809 | 0.4166 | 0.155 |
| C5   | 1.2500 | 0.4382  | 0.0840 | 0.199 |
| C4   | 1.3219 | 0.3208  | 0.1583 | 0.208 |
| Mn01 | 0.7500 | 0.2500  | 0.2500 | 0.057 |

**Table S12. Comparison of optical properties and particle size of Mn-based hybrid compounds.**

| Material                                                                                       | Peak position/FHWM  | PLQY     | Size              | Ref.      |
|------------------------------------------------------------------------------------------------|---------------------|----------|-------------------|-----------|
| $\text{CsMnCl}_3(\text{H}_2\text{O})_2$                                                        | 618 nm/70 nm        | N/A      | > 1 cm            | 1         |
| $\text{Cs}_3\text{MnBr}_5$                                                                     | 520 nm/42 nm        | 49%      | N/A               | 2         |
| $\text{PefH}_2[\text{MnBr}_4]$                                                                 | 521 nm/48 nm        | 45%      | N/A               | 3         |
| $(\text{C}_8\text{H}_{20}\text{N})_2\text{MnBr}_4$                                             | 515 nm/47 nm        | 85.1%    | 5 cm              | 4         |
| $(\text{C}_5\text{H}_6\text{N})_2\text{MnBr}_4$                                                | 521 nm/42 nm        | 95%      | 20 $\mu\text{m}$  | 5         |
| $(\text{C}_{10}\text{H}_{16}\text{N})_2\text{Zn}_{1-x}\text{Mn}_x\text{Br}_4$<br>( $x = 0-1$ ) | 518 nm/46 nm        | 0-89.91% | N/A               | 6         |
| $(\text{CH}_6\text{N}_3)_2\text{MnCl}_4$                                                       | 650 nm/86 nm        | 55.9%    | 10 $\mu\text{m}$  | 7         |
| $\text{C}_5\text{H}_5\text{NOMnCl}_2 \cdot \text{H}_2\text{O}$                                 | 656 nm/94 nm        | 24%      | 1 mm              | 8         |
| $(\text{NR}_4)_n\text{MnX}_4$                                                                  | 511-539 nm/47-62 nm | < 75%    | 10-100 mm         | 9         |
| $(\text{C}_8\text{H}_{20}\text{N})_2\text{MnBr}_4$                                             | 517 nm/47 nm        | 85%      | 1.5 $\mu\text{m}$ | This work |
| $(\text{C}_8\text{H}_{20}\text{N})_2\text{Zn}_{0.7}\text{Mn}_{0.3}\text{Br}_4$                 | 517 nm/47 nm        | ~80%     | 0.7 $\mu\text{m}$ | This work |

N/A: not available

**Table S13. Comparison of the thermal stability, photostability of other Mn-emitting hybrid compounds.**

| Material                                                                                             | Thermal stability | Photostability | Ref.      |
|------------------------------------------------------------------------------------------------------|-------------------|----------------|-----------|
| Cs <sub>3</sub> Mn <sub>0.96</sub> Zn <sub>0.04</sub> Br <sub>5</sub>                                | 120 °C, 84%       | N/A            | 2         |
| (C <sub>5</sub> H <sub>6</sub> N) <sub>2</sub> MnBr <sub>4</sub>                                     | N/A               | < 85%/14 Days  | 5         |
| (C <sub>9</sub> H <sub>15</sub> N <sub>3</sub> )ZnCl <sub>4</sub> :Mn <sup>2+</sup>                  | 120 °C, 65%       | N/A            | 10        |
| [(CH <sub>3</sub> ) <sub>4</sub> N] <sub>2</sub> Mn <sub>0.6</sub> Zn <sub>0.4</sub> Br <sub>4</sub> | N/A               | 50%/6 Days     | 11        |
| Cs <sub>3</sub> Mn <sub>0.6</sub> Zn <sub>0.4</sub> Br <sub>5</sub>                                  | 120 °C, 50%       | 50%/6 Days     | 12        |
| (ABI) <sub>2</sub> MnBr <sub>4</sub> :5%Zn <sup>2+</sup>                                             | 120 °C, 61.6%     | 95%/30 Days    | 13        |
| (C <sub>8</sub> H <sub>20</sub> N) <sub>2</sub> MnBr <sub>4</sub>                                    | 125 °C, 70%       | ~50%/30 Days   | This work |
| (C <sub>8</sub> H <sub>20</sub> N) <sub>2</sub> Zn <sub>0.7</sub> Mn <sub>0.3</sub> Br <sub>4</sub>  | 125 °C, 80%       | ~150%/30 Days  | This work |

N/A: not available

## References

1. H. Xiao, P. Dang, X. Yun, G. Li, Y. Wei, Y. Wei, X. Xiao, Y. Zhao, M. S. Molokeev, Z. Cheng and J. Lin, *Angewandte Chemie International Edition*, 2021, **60**, 3699-3707.
2. B. Su, M. S. Molokeev and Z. Xia, *Journal of Materials Chemistry C*, 2019, **7**, 11220-11226.
3. N. N. Golovnev, M. A. Gerasimova, M. S. Molokeev, M. E. Plyaskin and M. E. Baronin, *Journal of Molecular Structure*, 2022, **1248**, 131468.
4. T. Jiang, W. Ma, H. Zhang, Y. Tian, G. Lin, W. Xiao, X. Yu, J. Qiu, X. Xu, Y. Yang and D. Ju, *Advanced Functional Materials*, 2021, **31**, 2009973.
5. G. Hu, B. Xu, A. Wang, Y. Guo, J. Wu, F. Muhammad, W. Meng, C. Wang, S. Sui, Y. Liu, Y. Li, Y. Zhang, Y. Zhou and Z. Deng, *Advanced Functional Materials*, 2021, **31**, 2011191.
6. G. Zhou, Z. Liu, J. Huang, M. S. Molokeev, Z. Xiao, C. Ma and Z. Xia, *The Journal of Physical Chemistry Letters*, 2020, **11**, 5956-5962.
7. S. Wang, X. Han, T. Kou, Y. Zhou, Y. Liang, Z. Wu, J. Huang, T. Chang, C. Peng, Q. Wei and



- B. Zou, *Journal of Materials Chemistry C*, 2021, **9**, 4895-4902.
8. G. Dai, Z. Ma, Y. Qiu, Z. Li, X. Fu, H. Jiang and Z. Ma, *Inorganic Chemistry*, 2022, **61**, 12635-12642.
  9. Y.-Y. Ma, Y.-R. Song, W.-J. Xu, Q.-Q. Zhong, H.-Q. Fu, X.-L. Liu, C.-Y. Yue and X.-W. Lei, *Journal of Materials Chemistry C*, 2021, **9**, 9952-9961.
  10. X. Zhang, Y. Xiong, K. Liu, N. Wang, L. Fan, W. Li, X. Zhao, J. Zhao and Q. Liu, *Journal of Materials Chemistry C*, 2022, **10**, 13137-13142.
  11. X. Liu, J. Yang, W. Chen, F. Yang, Y. Chen, X. Liang, S. Pan and W. Xiang, *Nano Research*, 2022, DOI: 10.1007/s12274-022-5152-2.
  12. W. Chen, Q. He, Z. He, Q. Wang, J. Ding, Q. Huang, X. Liang, Z. Chen and W. Xiang, *ACS Sustainable Chemistry & Engineering*, 2022, **10**, 5333-5340.
  13. J. Lin, Z. Guo, N. Sun, K. Liu, S. He, X. Chen, J. Zhao, Q. Liu and W. Yuan, *Inorganic Chemistry*, 2022, **61**, 15266-15272.
